1 **Full title: Effect of salinity and water dilution on environmental DNA degradation**  
2 **in freshwater environments**

3 **Short title: Salinity and water dilution affect eDNA degradation in freshwater**  
4 **environments**

5 Tatsuya Saito<sup>1,\*</sup> and Hideyuki Doi<sup>2</sup>

6 <sup>1</sup>Graduate School of Simulation Studies, University of Hyogo, 7-1-28 Minatojima-  
7 minamimachi, Chuo-ku, Kobe, 650-0047, Japan

8 <sup>2</sup>Graduate School of Information Science, University of Hyogo, 7-1-28 Minatojima-  
9 minamimachi, Chuo-ku, Kobe, 650-0047, Japan

10

11 \*Corresponding author

12 email: [tatwoeight630@icloud.com](mailto:tatwoeight630@icloud.com)

13

## 14 **ABSTRACT**

15 Environmental DNA (eDNA) analysis methods have been developed to detect the  
16 distribution and abundance/biomass of organisms in various environments. eDNA  
17 generally degrades quickly, thus the study of eDNA degradation is critical for eDNA  
18 evaluation. However, there have only been a few studies of eDNA degradation  
19 experiments in which the salt concentration and water dilution were controlled. In this  
20 study, the effects of degradation were experimentally evaluated by controlling the  
21 salinity and water dilution of pond water. An experiment was conducted to evaluate the  
22 effects of salinity and dilution on eDNA detection with fragmental eDNA and free cell-  
23 derived eDNA using pond water, diluted pond water, and saline pond water. We  
24 quantified the eDNA copies of free cells, fragmental DNA, and the eDNA from  
25 *Cyprinus carpio*. In both the diluted and saline pond water, we found that the  
26 degradation rate of eDNA was much slower than that in pond water. Furthermore, the  
27 DNA concentration did not exponentially decrease in both the saline purified water and  
28 purified water samples. For the lower degradation rate in salt water, we interpreted that  
29 salts may affect DNA degradation factors such as microbe compositions and activities.  
30 The effect of salinity and dilution on eDNA detection provides fundamental information

31 about the degradation process of eDNA, which is essential to understand the behavior of

32 eDNA in natural environments.

33 **KEYWORDS:** eDNA, degradation rate, pond, quantitative real-time PCR

## 34 INTRODUCTION

35 Environmental DNA (eDNA) evaluation methods have been developed to monitor  
36 macroorganism communities and manage aquatic ecosystems [1–4]. eDNA is the DNA  
37 released by organisms into an environment, such as water or soil, and derives from the  
38 feces [5], skin cells [1], mucus [6], and secretions [7] of the organisms. In addition, this  
39 eDNA can be collected in aquatic systems [1,8]. The DNA sources are mainly fractions  
40 of cells or organelles but can also be free DNA fragments suspended in the water [9,10].

41 An understanding of eDNA degradation, which is a critical eDNA  
42 characteristic, is important for eDNA evaluation for both species distribution and  
43 abundance/biomass [11–13]. To reveal the states of eDNA, especially its degradation  
44 rate, many experiments have been conducted under various conditions [14,15], such as  
45 varied temperature [16,17], pH [15,18], and salinity [11].

46 eDNA is measured over an experimental period to evaluate eDNA release and  
47 degradation [14,15,19]. The degradation curves of the eDNA in most experiments have  
48 been observed to have exponentially declined [12] and eDNA concentrations can  
49 decay below the limit of detection in less than a week [13–15].

50                   In previous meta-analyses of eDNA [12,20], it was similarly shown that no  
51 significant difference could be observed in the eDNA degradation rates between  
52 freshwater and seawater. However, the results of degradation experiments using sea and  
53 pond water have shown that the eDNA degradation rate would be slower in the sea [13].  
54 Collins et al. [11] found that there is a slower eDNA degradation rate in marine areas  
55 with higher salt concentrations. There have been only a few studies of eDNA  
56 degradation in which the salt concentration was controlled, despite its importance for  
57 eDNA evaluation in the field. Therefore, we evaluated the effect of salinity on eDNA  
58 degradation by conducting degradation experiments. Furthermore, water dilution can  
59 potentially reduce the factors of eDNA degradation, such as the enzymes and microbes  
60 that degrade DNA. Thus, we also tested the effect of water dilution on eDNA  
61 degradation in the same manner.

62                   The aim of this study was to observe and compare the effects of salinity and  
63 water dilution on the eDNA degradation rate in freshwater environments. To understand  
64 the degradation in each DNA source, such as individual-derived, cell-derived, and  
65 fragmental DNA [13], we evaluated the effects of salinity and dilution on eDNA  
66 detection while considering the fragmental eDNA, free cell-derived eDNA, and eDNA  
67 derived from the resident species of the pond.

68

## 69 MATERIALS AND METHODS

### 70 *Experimental design*

71 We collected pond water, diluted pond water, and salined pond water and divided each  
72 water sample into bottles (Wide-Mouth Bottle, 500mL; AS ONE, Osaka, Japan) (Figure  
73 1). We collected the pond water from an artificial pond in Kobe (the same pond used in  
74 Saito & Doi [13]). A solution of isolated cells (from *Oncorhynchus kisutch*) and  
75 fragmental DNA (from an internal positive control [IPC, 207-bp,  $1.5 \times 10^5$  copies;  
76 Nippon Gene, Tokyo, Japan]) was added to each bottle (Figure 1). The pond water  
77 contained the eDNA of the resident common carp (*Cyprinus carpio*). We used *O.*  
78 *kisutch* tissue for the isolation of cells because this species is not distributed in the pond.  
79 We conducted the experiment for seven days. Water samples (500 mL) from each bottle  
80 were filtered and collected using a Sterivex filter (0.45  $\mu\text{m}$  pore size; Merck Millipore,  
81 Burlington, MA, USA; Figure 1). After extracting eDNA from the Sterivex filter, the  
82 copy number of each type of DNA contained in the Sterivex samples and filtrate was  
83 estimated by quantitative real-time PCR (qPCR, Figure 1).

84

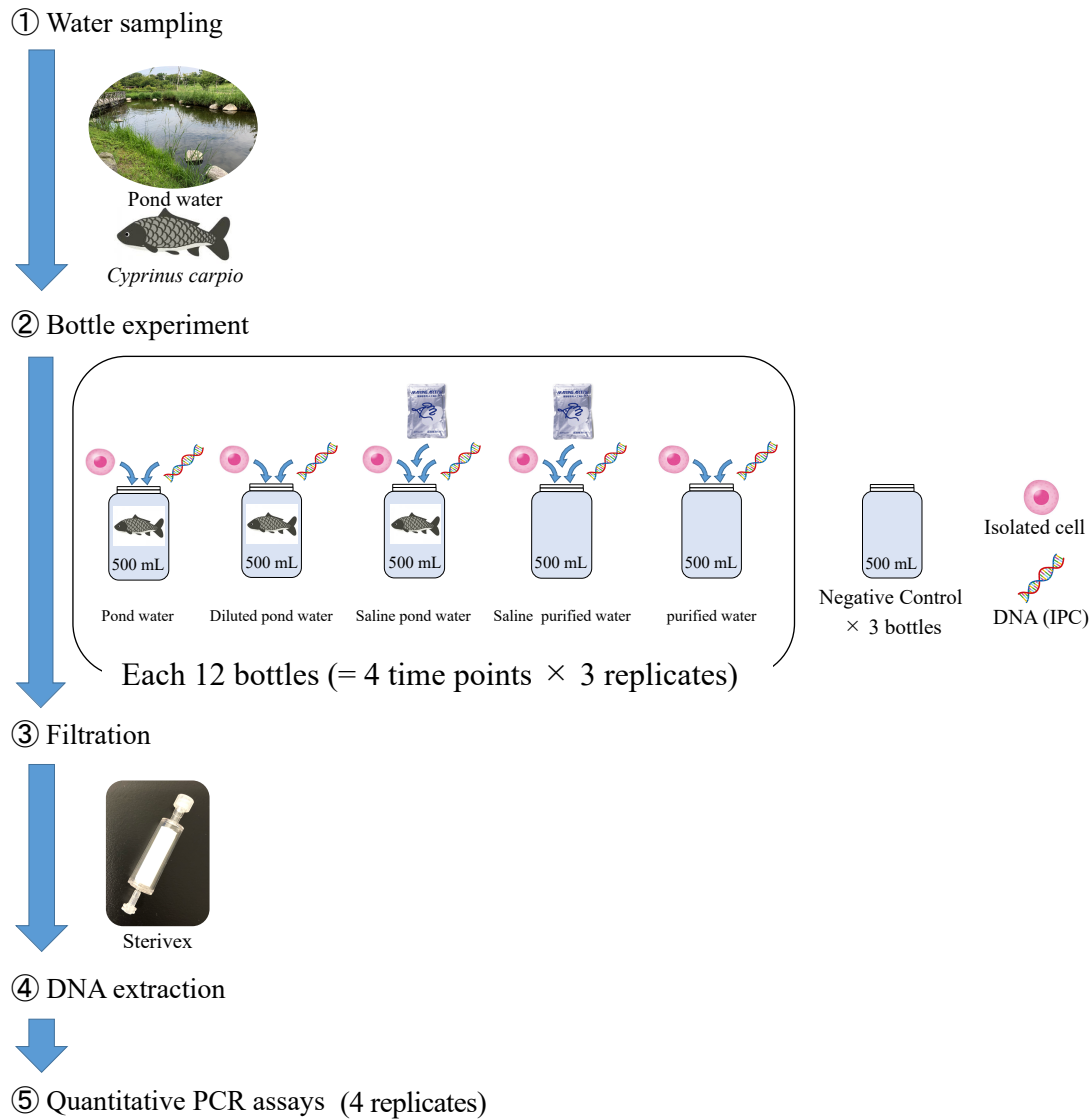

85

86 Fig 1. Experimental overview of the bottle experiments. We collected pond water,

87 purified water, diluted pond water, saline pond water, and saline purified water and

88 divided each type of water into 12 bottles. A solution of isolated cells (from

89 *Oncorhynchus kisutch*) and fragmental DNA (IPC) was added to each bottle. The pond

90 water was expected to contain the environmental DNA (eDNA) of *Cyprinus carpio*. We

91 used *O. kisutch* tissue for the isolation of cells. We conducted the experiment for seven

92 days. A Sterivex filter was used to filter 500-mL samples of water from each bottle.

93 After extracting eDNA, the copy number of each type of DNA was estimated by

94 quantitative real-time PCR.

95

### 96 *Bottle experiment*

97 We collected the pond water from an artificial pond in Kobe, Japan (34°39' 40" N, 135°

98 13' 02" E) on July 16, 2020, using bleached tanks. We measured the salt concentration

99 (salinity) and temperature of the collected water using a salinity meter (CD-4307SD;

100 Mother Tool, Nagano, Japan) and a thermometer (ProODO; YSI, Tokyo, Japan),

101 respectively. The salt concentration (salinity) and water temperature at the time of the

102 water collection were 0.04 and 26.5 °C, respectively.

103 For the saline water, artificial seawater powder (Marine Art BR; Osaka

104 Yakken, Osaka, Japan) was added to the pond water and purified water to increase the

105 salinity to 3.3, the mean seawater salinity around Japan. For the diluted pond water, the

106 pond water and purified water (A300; AS ONE) were mixed at a ratio of 1:9. The pond

107 water, purified water, diluted pond water, saline pond water, and saline purified water

108 were each divided into 12 bottles (500 mL each). The bottles and equipment were



109 sterilized with 10% commercial bleach (ca. 0.6% hypochlorous acid), (KAO, Tokyo,  
110 Japan) and washed with DNA-free distilled water to avoid DNA contamination.

111 Each bottle received 100  $\mu$ L of a solution of isolated cells [ $1.0 \times 10^5$  copies]  
112 and DNA (IPC). The bottles were incubated in the laboratory at about 25 °C for a week.  
113 We collected and filtered 500 mL of the water from each bottle using 0.45- $\mu$ m Sterivex  
114 filters (Merck Millipore) at 0, 3, 12, and 168 (day 7) h after the introduction of the cells  
115 and DNA. After filtration, approximately 2 mL of RNAlater (Thermo Fisher Scientific,  
116 Waltham, MA, USA) was injected into the Sterivex. As a filtration blank, the 500 mL  
117 of DNA-free water was filtered in the same manner after filtration of the samples to  
118 monitor cross-contamination. The Sterivex filters were immediately stored at  $-20$  °C  
119 until further analysis.

120

#### 121 *DNA extraction*

122 DNA was extracted from the Sterivex filter using a DNeasy Blood and Tissue Kit  
123 (Qiagen, Hilden, Germany) following Miya et al. [21] and Minamoto et al. [22]. The  
124 RNAlater was removed using a 50-mL syringe, and 440  $\mu$ L of the mixture (220  $\mu$ L of  
125 phosphate-buffered saline, 200  $\mu$ L of Buffer AL, and 20  $\mu$ L of proteinase K [Qiagen])

126 was added to the Sterivex filter. We incubated the filters on a rotary shaker (AS ONE)  
127 at 20 rpm for 20 min in a 56 °C dry oven. We transferred the incubated mixture into a  
128 new 1.5 mL tube by centrifugation at 5000 g for 5 min. We then purified the mixture  
129 using a DNeasy Blood and Tissue Kit, and finally eluted the DNA in 100 µL of buffer  
130 AE from the kit. The extracted DNA from both methods was stored at –20 °C until  
131 qPCR analysis.

132

### 133 *Quantitative PCR assays*

134 We performed the qPCR analysis for *C. carpio* [2], *O. kisutch*, and the IPC [13]. We  
135 quantified the DNA concentrations by qPCR using a PikoReal™ qPCR system (Thermo  
136 Fisher Scientific). Each TaqMan reaction contained 900 nM of forward and reverse  
137 primers and 125 nM of a TaqMan probe in the 1× TaqPath™ qPCR master mix  
138 (Thermo Fisher Scientific). To this, 2 µL of the sample template was added to reach a  
139 final volume of 10 µL. A four step dilution series containing  $1.5 \times 10^1$  to  $1.5 \times 10^4$   
140 copies was prepared and used as quantification standards. For the standard curves, we  
141 used target DNA cloned into a plasmid.

142           A quantitative PCR was performed with the following conditions: 2 min at 50  
143   °C, 10 min at 95 °C, and 55 cycles of 15 s at 95 °C and 1 min at 60 °C. Four replicates  
144   were performed for each sample, and four replicate negative non-template controls  
145   (NTC) containing DNA-free water instead of template DNA were included in all PCR  
146   plates. We performed the qPCR procedures according to the MIQE checklist [23]. The  
147   PCR and qPCR were set up in two separate rooms to avoid DNA contamination.

148           The qPCR results were analyzed using PikoReal software ver. 2.2.248.601  
149   (Thermo Fisher Scientific). The R<sup>2</sup> values of the standard curves ranged from 0.985–  
150   0.998 (Supplementary Information) and the PCR varied from 91.07–101.68%. The  
151   concentration of DNA in the water collected (DNA copies mL<sup>-1</sup>) was calculated based  
152   on the volume of filtered water. DNA copy numbers were evaluated including negative  
153   amplifications set as zero values. In our previous study [13], we have already performed  
154   a limit of detection (LOD) test for the PCR assay, which resulted in one copy for the  
155   LOD.

156

157   *Statistical analysis*

158 Statistical analysis and data plotting were performed using R software version 3.6.0  
159 [24]. We used the Single First-Order rate model (SFO) as the degradation model  
160 because the SFO was the most effective model of degradation in Saito and Doi [13].  
161 The SFO establishes a simple procedure for determining a first-order rate constant from  
162 the degradation. The model equation is as follows:

$$163 \quad C = C_0 e^{kt} \text{ (model 1, SFO)} \quad (1),$$

164 where  $C$  is the eDNA concentration at time  $t$ ,  $C_0$  is the eDNA concentration at time 0  
165 (i.e., the initial eDNA concentration), and  $k$  is the degradation rate constant per hour.

166 We performed modeling using the “mkin” package version 0.9.49.8 in the R software.

167 We evaluated the fit of the models using the chi-squared error level [25](Boesten et

168 al.,2005). Significant differences in the model coefficients were evaluated by

169 overlapping the 95% confidential intervals (CIs) of the coefficients (i.e.,  $\alpha = 0.05$ ).

170

## 171 **RESULTS**

172 *Degradation of eDNA in saline pond water*

173 We detected all the targeted DNA of *C. carpio*, the *O. kisutch* cells, and the IPC using  
174 qPCR in saline pond water (Figure 2). The degradation rates in the saline pond water  
175 were significantly lower than those in the regular pond water for all three DNA sources  
176 (Table 1, Figure 3). We could not detect the eDNA of *C. carpio*, the *O. kisutch* cells, or  
177 the IPC on day seven in the pond water. However, we detected the eDNA of *C. carpio*  
178 and the IPC in the saline pond water up to day seven. There were no amplifications  
179 from the filter, extraction blanks, and NTCs in this experiment or in the following  
180 experiments.

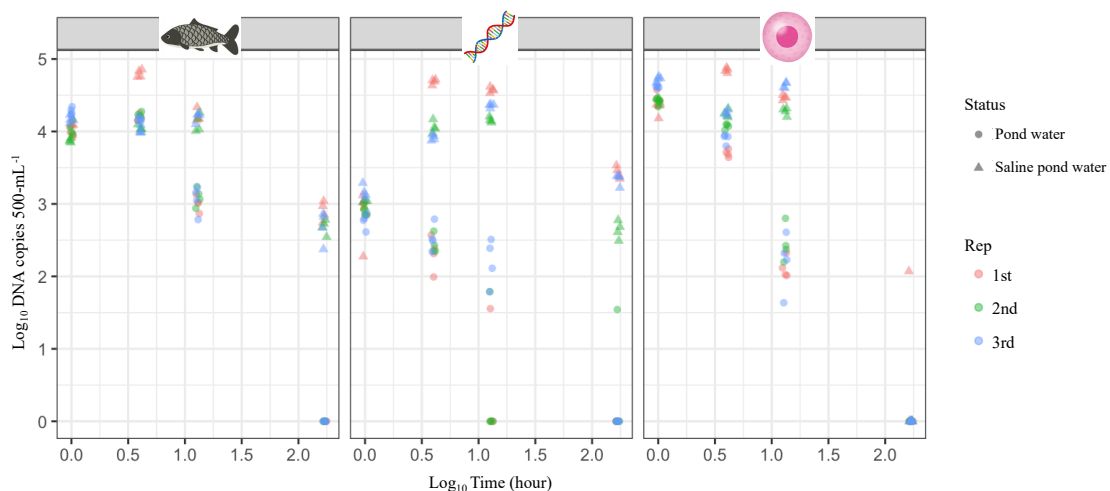

181

182 Fig 2. Relationship between the environmental DNA (eDNA) concentrations of the  
183 water source (pond water and saline pond water). The dots indicate the eDNA  
184 concentrations of the targets at each time point under two water conditions: pond water,

185 circles; saline pond water, triangles (N = 12 for each time point: 1st replication, red; 2nd  
186 replication, green; 3rd replication, blue).

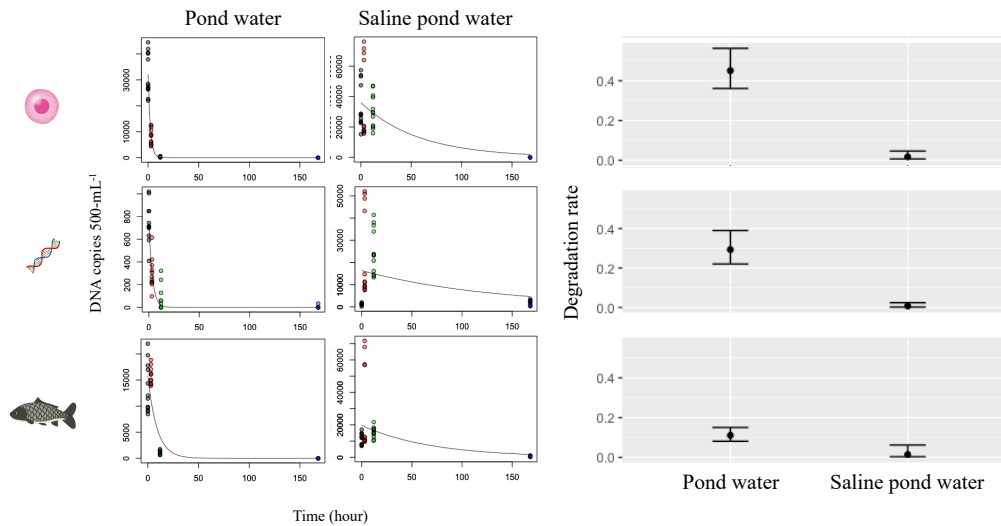

187

188 Figure 3. Degradation curves of the Single-First Order (SFO) model and the rate  
189 constant for the bottle experiments in the saline pond water and pond water. The dots  
190 indicate the environmental DNA concentrations of the targets (*Cyprinus carpio*, the  
191 internal positive control [IPC], and *Oncorhynchus kisutch* cells) at each time point with  
192 different colors (N = 12 for each time point). The left degradation curves show each  
193 target (*O. kisutch* cells, the IPC, and *C. carpio*) in the pond samples. The right decay  
194 curves show each target (*O. kisutch* cells, the IPC, and *C. carpio*) in the saline pond  
195 samples. In the right-hand plots, the slopes (k) of each target (*O. kisutch* cells, the IPC,  
196 and *C. carpio*) are shown with 95% confidential intervals.

197

198 Table 1. Degradation rate constant of Single-First Order models. The values are slope  $k$   
199 and the values in parentheses are the lower and upper confidential intervals of slope  $k$ .

| Water        | IPC                           | Okis                       | Cyca                       |
|--------------|-------------------------------|----------------------------|----------------------------|
| Pond         | 0.293 (0.2202, 0.3899)        | 0.4510 (0.3612, 0.5631)    | 0.1107 (0.0813, 0.1506)    |
| Saline pond  | 0.00757 (0.002361, 0.024270)  | 0.01746 (0.00659, 0.04626) | 0.01465 (0.00344, 0.06244) |
| Diluted pond | 0.009872 (0.004441, 0.021950) | 0.03306 (0.02026, 0.05394) | 0.02519 (0.01592, 0.03986) |

200 Cyca, *Cyprinus carpio*; IPC, internal positive control; Okis, *Oncorhynchus kisutch* cells.

201

202 The degradation rate constant ( $k$ ) of the cells, IPC, and *C. carpio* were  
203 significantly different between the saline pond and pond samples when comparing the  
204 95% CIs (Figures 2 and 3). The degradation rates of the saline pond were significantly  
205 lower than those of the pond water for all three DNA sources.

206

207 *Degradation of eDNA in saline purified water*

208 We detected all the targeted DNA of the *O. kisutch* cells and the IPC using qPCR in the  
209 saline purified water (Figure 4). We detected the *O. kisutch* cells and the IPC DNA in  
210 the purified water and saline purified water, respectively, up to 168 h. The DNA

211 concentrations of the cells and IPC DNA did not decrease exponentially after they were  
212 added (0 h).

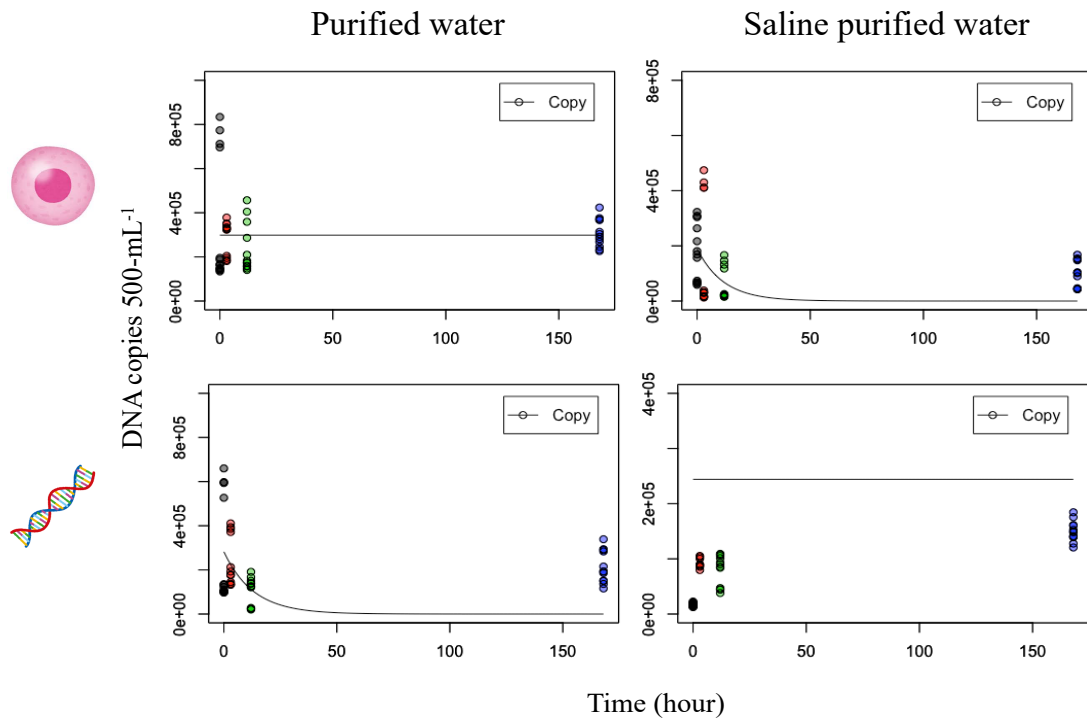

213  
214 Fig 4. Degradation curves of the Single-First Order model (SFO) for the bottle  
215 experiments in the saline purified water and purified water. The dots indicate the  
216 environmental DNA concentrations of the targets (the internal positive control [IPC]  
217 and *Oncorhynchus kisutch* cells) at each time point with different colors (N = 12 for  
218 each time point). The left degradation curves show each target (*O. kisutch* cells and the  
219 IPC) in the purified water samples. The right decay curves show each target (*O. kisutch*  
220 cells and the IPC) in the saline purified water samples.



221

## 222 *Degradation of eDNA in diluted pond water*

223 We detected three of the targeted DNA types, *C. carpio*, *O. kisutch* DNA from the cells,

224 and the IPC, using qPCR in diluted pond water (Figure 5). The degradation rates of the

225 diluted pond were significantly lower than those of the pond water for all three DNA

226 sources (Table 1, Figure 6). We could not detect the eDNA of *C. carpio*, the *O. kisutch*

227 cells, and the IPC at 168 h in the pond water. However, we detected the eDNA of *C.*

228 *carpio* and the IPC in the diluted pond water up to 168 h.

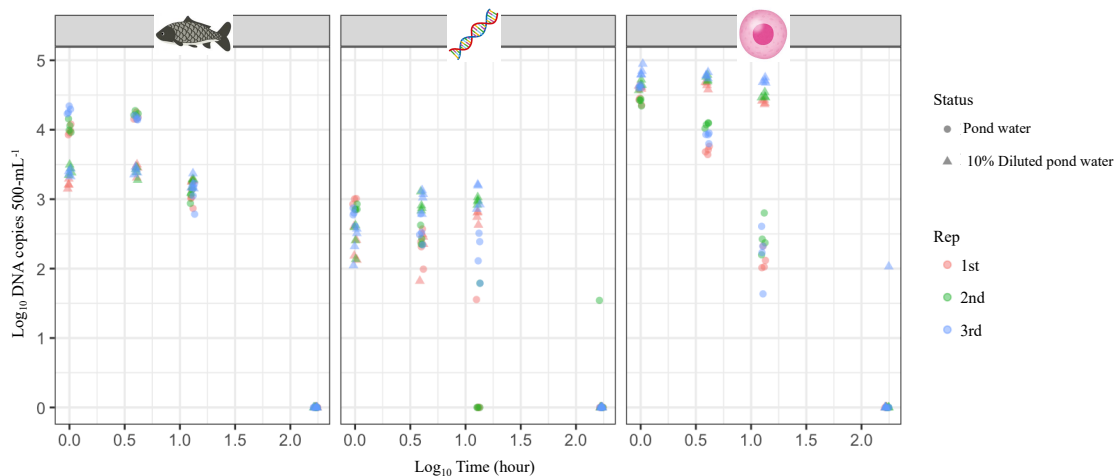

229

230 Fig 5. Relationship between the environmental DNA (eDNA) concentrations of the

231 water source (pond water and 10% diluted pond water). The dots indicate the eDNA

232 concentrations of the targets at each time point under two water conditions: pond water,

233 circles; diluted pond water, triangles (N = 12 for each time point: 1st replication, red;  
234 2nd replication, green; 3rd replication, blue).

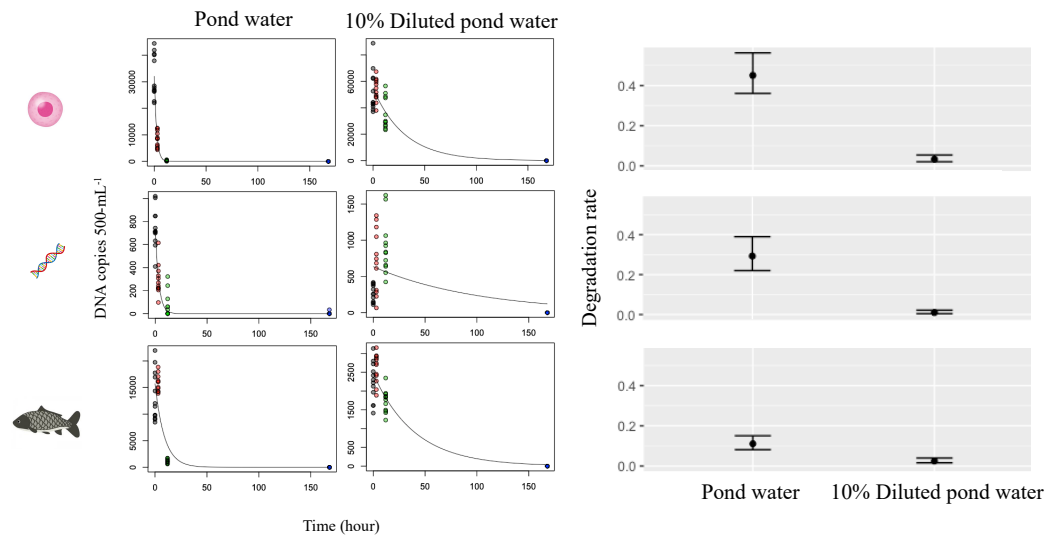

235

236 Fig 6. Degradation curves of the Single-First Order model (SFO) and the rate constant

237 for the bottle experiments in diluted pond water and pond water. The dots indicate the

238 environmental DNA concentrations of the targets (*Cyprinus carpio*, the internal positive

239 control [IPC], and *Oncorhynchus kisutch* cells) at each time point with different colors

240 (N = 12 for each time point). The left degradation curves show each target (*O. kisutch*

241 cells, the IPC, and *C. carpio*) in the pond samples. The right decay curves show each

242 target (*O. kisutch* cells, the IPC, and *C. carpio*) in the diluted pond samples. In the right-

243 hand plots, the slopes (k) of each target (*O. kisutch* cells, the IPC, and *C. carpio*) are

244 shown with 95% confidential intervals.

245

246           The degradation rate constant ( $k$ ) of the cells, IPC, and *C. carpio* were  
247 significantly different between the diluted pond and pond samples when comparing the  
248 95% CIs (Figure 6). The degradation rates in the diluted pond water were significantly  
249 lower than those in the pond water for all three DNA sources.

250

## 251 **DISCUSSION**

252 We found that the DNA concentrations of the *C. carpio*, *O. kisutch* cells, and the IPC  
253 did not decline exponentially in both the saline purified water and purified water  
254 samples. Our present results supported our previous study [13]. Furthermore, we  
255 detected the DNA in the saline purified water. This result showed that the increased  
256 salinity in the saline sample did not have any effect on DNA detection.

257           The degradation rates in the saline pond samples were significantly lower than  
258 those in the pond water for all three DNA sources. This result might suggest that  
259 salinity suppresses the degradation of eDNA. However, the results of a meta-analysis of  
260 eDNA degradation showed that the eDNA degradation rates between freshwater and

261 seawater are not significantly different [12,20]. A previous study [11] found salinity to  
262 be a better predictor of eDNA decay than pH, with salinity varying more between  
263 locations. They also showed that salinity itself may not be entirely responsible for the  
264 difference in degradation rate, but rather that it is associated with abundances or  
265 communities of microbes. In fact, the characteristics of microorganisms involved in  
266 DNA degradation may vary depending on the environment. For example,  
267 microorganisms living in freshwater are susceptible to salinity and cannot adapt to the  
268 rapid environmental change caused by salt addition, which is thought to reduce their  
269 activity and suppress DNA degradation. Therefore, the results of our study suggest that  
270 salts would be unlikely to protect DNA and may affect DNA degradation factors,  
271 including microbe composition changes and the activity of DNA enzymes in the water.  
272 Further evaluation of microbe compositions and DNA enzymes in salt water is needed  
273 to gain a deeper understanding of the degradation of eDNA.

274           The degradation rates in the diluted pond samples were significantly lower  
275 than those in the pond water for all three DNA sources. In the pond water diluted 10  
276 times, the initial DNA concentration was reduced to one-tenth, but the degradation rate  
277 was slower than that in the pond water. This is thought to be due to the dilution of the  
278 degradation factors as well as the eDNA. Takasaki et al. [26] showed that pre-filters that

279 remove humic substances such as humic acid and fulvic acid are effective in detecting  
280 eDNA. Our results showed that simply diluting eDNA without removing its degraders  
281 and inhibitors was effective. However, the DNA was not detected after seven days.  
282 Therefore, it was found that even if the concentration of the degradation factor is low,  
283 the degradation progresses over time.

284           Our experiments provide new findings on eDNA degradation; however, there  
285 were some limitations owing to the experimental design. First, we performed the  
286 experiment using only one site for collecting the pond samples. Therefore, it is unclear  
287 whether similar DNA degradation rates exist seasonally and in the other aquatic habitats  
288 such as river and wetlands. Experiments using a selection of site replicates from various  
289 habitats need to be performed to achieve a more generalized understanding of eDNA  
290 degradation. The evaluation of eDNA degradation while comparing different  
291 environmental conditions (e.g., salinity, water temperature, pH, chlorophyll, and  
292 microorganism population) may reveal what is affecting eDNA degradation in general.

293           In conclusion, we found that the DNA concentrations of the *C. carpio*, *O.*  
294 *kisutch* cells, and the IPC did not decline exponentially in both the saline purified water  
295 and purified water samples. The degradation rates of the saline pond and pond samples

296 were significantly different. The degradation rates of the diluted pond and pond samples  
297 were significantly different. A greater understanding of and the accumulation of basic  
298 information about eDNA would improve eDNA analysis methods and enable  
299 researchers to maximize the potential of future eDNA methods.

300

### 301 ACKNOWLEDGMENTS

302 This study was supported by the Environment Research and Technology Development  
303 Fund (JPMEERF20164002 and JPMEERF20204004 ) of the Environmental Restoration  
304 and Conservation Agency, Japan.

305

### 306 DATA ACCESSIBILITY

307 All data, including the raw values for the qPCR experiments, are included in the  
308 supporting information.

309

### 310 REFERENCES

311

- 312 1. Ficetola GF, Miaud C, Pompanon F, Taberlet P. Species detection using  
313 environmental DNA from water samples. *Biol Lett*. 2008; 4(4): 423–425.
- 314 2. Takahara T, Minamoto T, Yamanaka H, Doi H, Kawabata ZI. Estimation of fish  
315 biomass using environmental DNA. *PLoS One*. 2012; 7(4): e56584.
- 316 3. Minamoto T, Yamanaka H, Takahara T, Honjo MN, Kawabata ZI. Surveillance of  
317 fish species composition using environmental DNA. *Limnology*. 2012; 13(2): 193–197.
- 318 4. Tsuji S, Takahara T, Doi H, Shibata N, Yamanaka H. The detection of aquatic  
319 macroorganisms using environmental DNA analysis—A review of methods for  
320 collection, extraction, and detection. *Environ DNA*. 2019; 1(2): 99–108.
- 321 5. Martellini A, Payment P, Villemur R. Use of eukaryotic mitochondrial DNA to  
322 differentiate human, bovine, porcine and ovine sources in fecally contaminated surface  
323 water. *Water Res*. 2005; 39(4): 541–548.
- 324 6. Merkes CM, McCalla SG, Jensen NR, Gaikowski MP, Amberg JJ. Persistence of  
325 DNA in carcasses, slime and avian feces may affect interpretation of environmental  
326 DNA data. *PLoS One*. 2014; 9(11): e113346.

- 327 7. Bylemans J, Furlan EM, Hardy CM, McGuffie P, Lintermans M, Gleeson DM. An  
328 environmental DNA-based method for monitoring spawning activity: A case study,  
329 using the endangered Macquarie perch (*Macquaria australasica*). *Methods Ecol Evol.*  
330 2017; 8(5): 646–655.
- 331 8. Turner CR, Uy KL, Everhart RC. Fish environmental DNA is more concentrated in  
332 aquatic sediments than surface water. *Biol Conserv.* 2015; 183: 93–102.
- 333 9. Turner CR, Miller DJ, Coyne KJ, Corush J. Improved methods for capture,  
334 extraction, and quantitative assay of environmental DNA from Asian bigheaded carp  
335 (*Hypophthalmichthys* spp.). *PLoS One.* 2014; 9(12): e114329.
- 336 10. Minamoto T, Naka T, Moji K, Maruyama A. Techniques for the practical  
337 collection of environmental DNA: filter selection, preservation, and extraction.  
338 *Limnology.* 2016; 17(1): 23–32.
- 339 11. Collins RA, Wangenstein OS, O’Gorman EJ, Mariani S, Sims DW, Genner MJ.  
340 Persistence of environmental DNA in marine systems. *Commun Biol.* 2018; 1(1): 1–11.



- 341 12. Saito T, Doi H. A Model and Simulation of the Influence of Temperature and  
342 Amplicon Length on Environmental DNA Degradation Rates: A Meta-Analysis  
343 Approach. *Front Ecol Evol.* 2021a; 9: 139.
- 344 13. Saito T, Doi H. Degradation modeling of water environmental DNA: Experiments  
345 on multiple DNA sources in pond and seawater. *Environ DNA.* 2021b;  
346 <https://doi.org/10.1002/edn3.192>.
- 347 14. Thomsen PF, Kielgast J, Iversen LL, Møller PR, Rasmussen M, Willerslev E.  
348 Detection of a diverse marine fish fauna using environmental DNA from seawater  
349 samples. *PLoS One.* 2012; 7(8): e41732.
- 350 15. Barnes MA, Turner CR, Jerde CL, Renshaw MA, Chadderton WL, Lodge DM.  
351 Environmental conditions influence eDNA persistence in aquatic systems. *Environ Sci*  
352 *Technol.* 2014; 48(3): 1819–1827.
- 353 16. Tsuji S, Ushio M, Sakurai S, Minamoto T, Yamanaka H. Water temperature-  
354 dependent degradation of environmental DNA and its relation to bacterial abundance.  
355 *PLoS One.* 2017; 12(4): e0176608.

- 356 17. Jo T, Murakami H, Yamamoto S, Masuda R, Minamoto T. Effect of water  
357 temperature and fish biomass on environmental DNA shedding, degradation, and size  
358 distribution. *Ecol Evol.* 2019; 9(3): 1135–1146.
- 359 18. Tsuji S, Yamanaka H, Minamoto T. Effects of water pH and proteinase K  
360 treatment on the yield of environmental DNA from water samples. *Limnology.* 2017;  
361 18(1): 1–7.
- 362 19. Maruyama A, Nakamura K, Yamanaka H, Kondoh M, Minamoto T. The release  
363 rate of environmental DNA from juvenile and adult fish. *PLoS One.* 2014; 9(12):  
364 e114639.
- 365 20. Jo T, and Minamoto T. Complex interactions between environmental DNA  
366 (eDNA) state and water chemistries on eDNA persistence suggested by meta-analyses.  
367 *Mol Eco Res.* 2020; <https://doi.org/10.1111/1755-0998.13354>.
- 368 21. Miya M, Minamoto T, Yamanaka H, Oka SI, Sato K, Yamamoto S, et al. Use of a  
369 filter cartridge for filtration of water samples and extraction of environmental DNA. *J*  
370 *Vis Exp.* 2016; Nov (117): e54741.

371 22. Minamoto T, Miya M, Sado T, Seino S, Doi H, Kondoh M, et al. An illustrated  
372 manual for environmental DNA research: Water sampling guidelines and experimental  
373 protocols. *Environ DNA*. 2021; 3(1): 8-13.

374 23. Bustin SA, Benes V, Garson JA, Hellemans J, Huggett J, Kubista M, et al. The  
375 MIQE Guidelines: Minimum Information for Publication of Quantitative Real-Time  
376 PCR Experiments. *Clinical Chemistry*. 2009; 55(4): 611– 622.

377 24. R Core Team. *R: A Language and Environment for Statistical Computing*.  
378 Vienna: R Foundation for Statistical Computing. 2020

379 25. Boesten JJTI, Aden K, Beigel C, Beulke S, Dust M, Dyson JS, et al. Guidance  
380 document on estimating persistence and degradation kinetics from environmental fate  
381 studies on pesticides in EU registration. Report of the FOCUS Work Group on  
382 Degradation Kinetics. EC Doc. Ref. 2005; Sanco/10058/2005, version 1.

383 26. Takasaki K, Aihara H, Imanaka T, Matsudaira T, Tsukahara K, Usui A, et al.  
384 Water pre-filtration methods to improve environmental DNA detection by real-time  
385 PCR and metabarcoding. *PLoS One*. 2021; 16(5): e0250162.

386

387
